# Supplementary material
Source: PubMed Central journal article supplement (PMC3148730)
Supplement: JCI44957sd.pdf [file JCI44957sd.pdf]

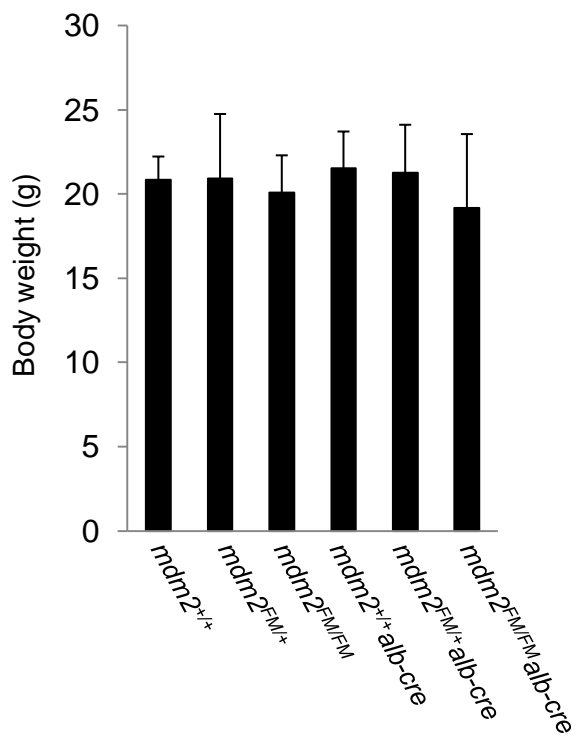

Supplementary Figure 1

Cre(-)

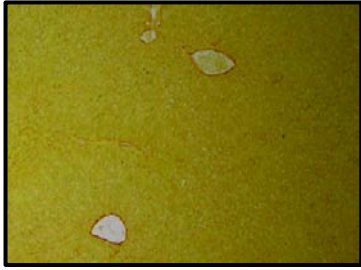

Cre(+)

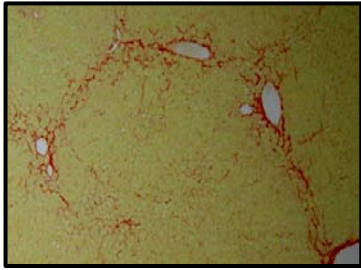

Supplementary Figure 2

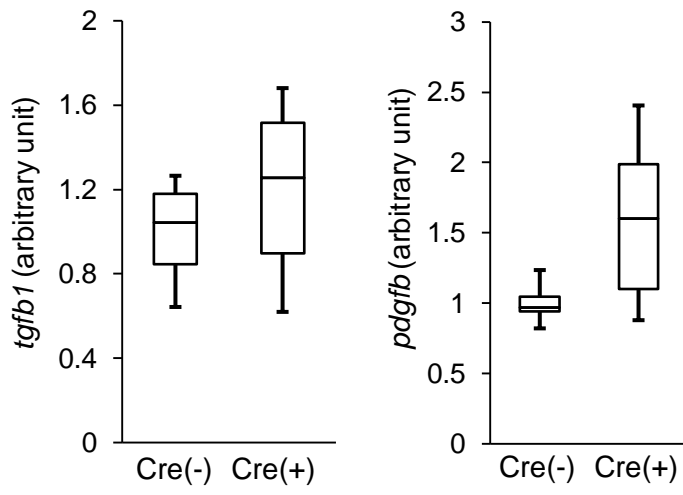

Supplementary Figure 3

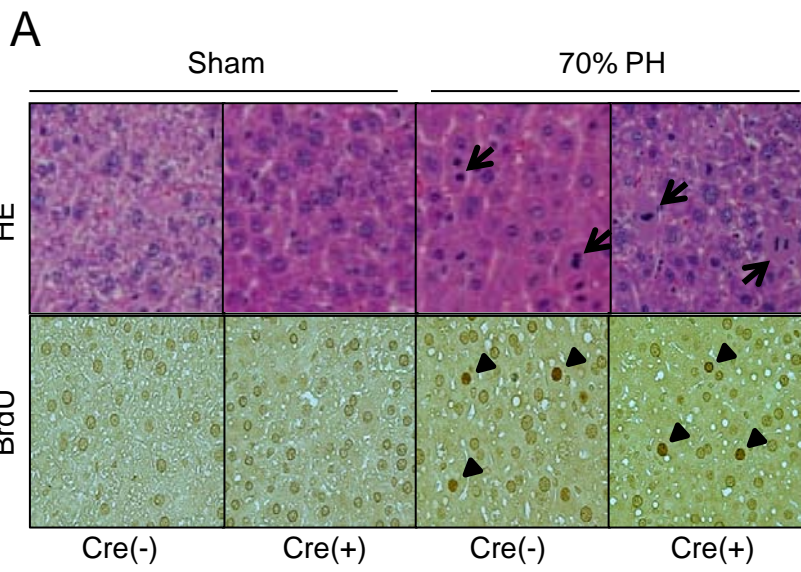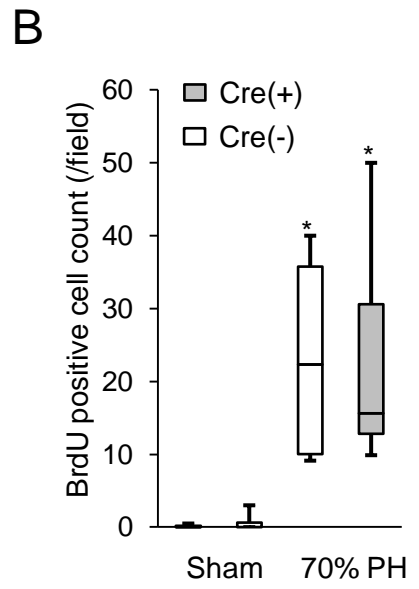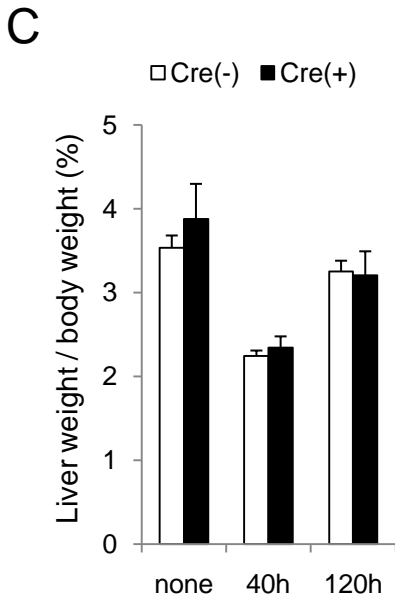

Supplementary Figure 4

Cre(-)

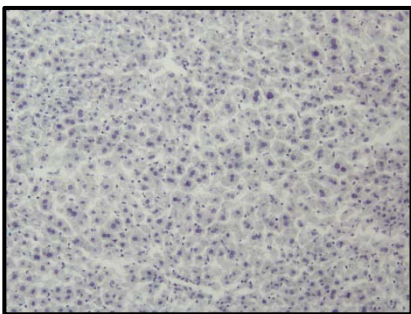

Cre(+)

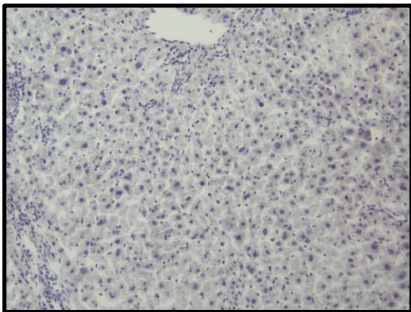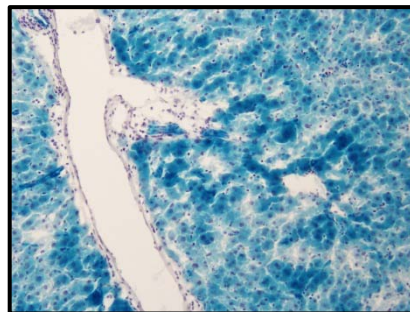

Alb-Cre(+)  
ROSA26-LacZ(+)

Supplementary Figure 5

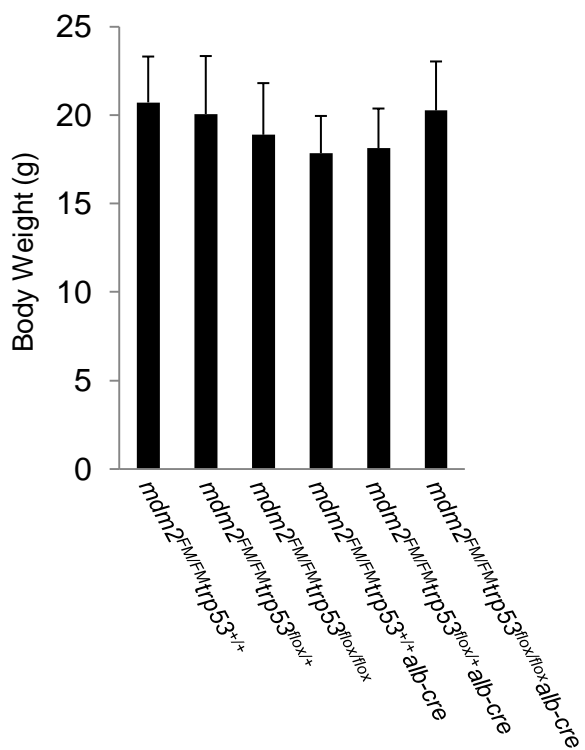

Supplementary Figure 6

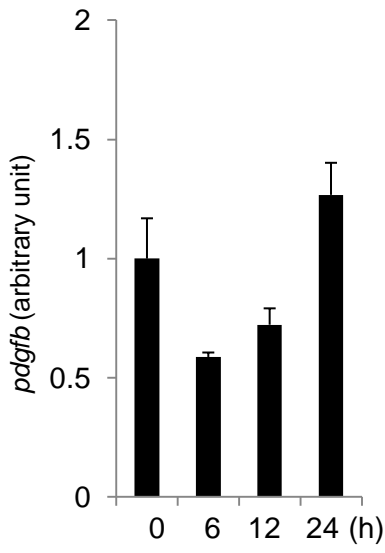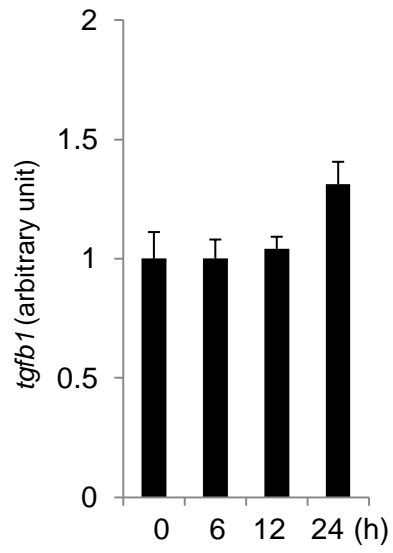

Supplementary Figure 7

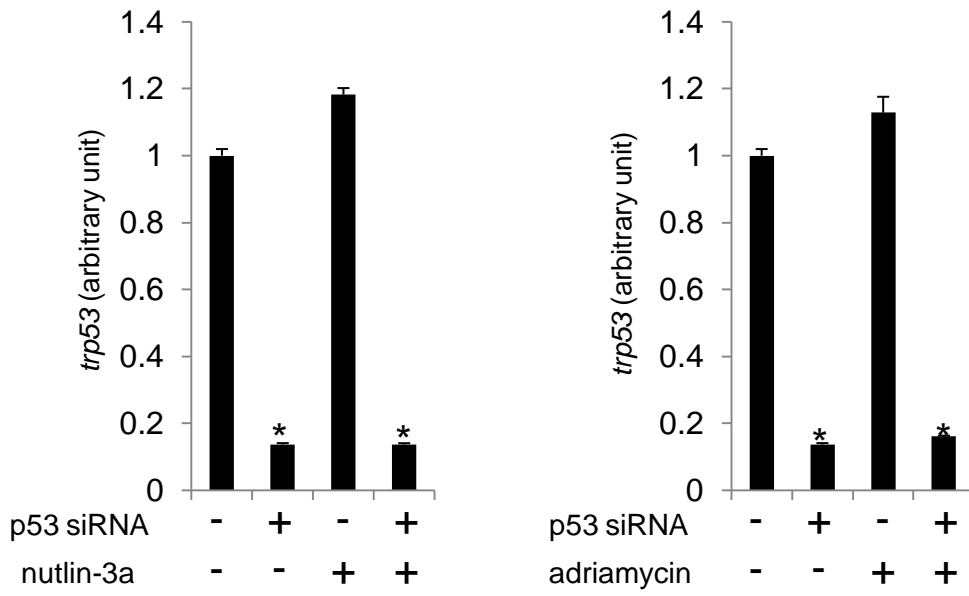

Supplementary Figure 8



A

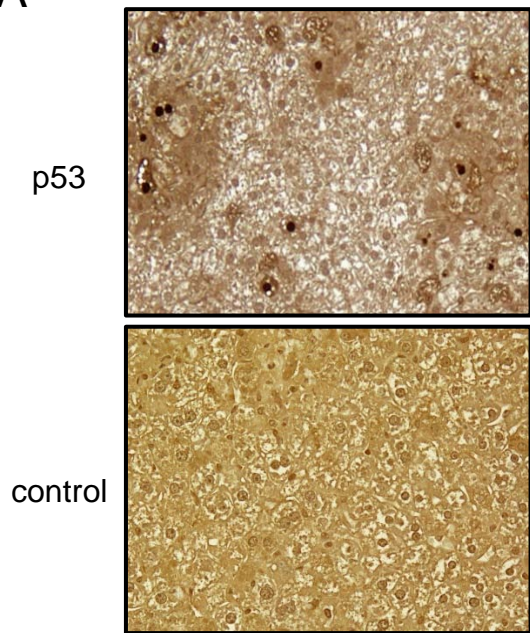

B

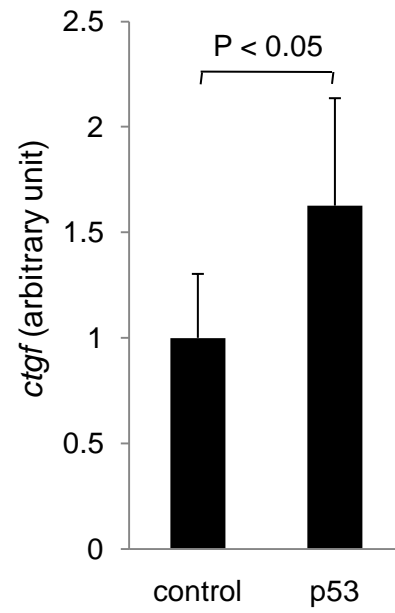

Supplementary Figure 9

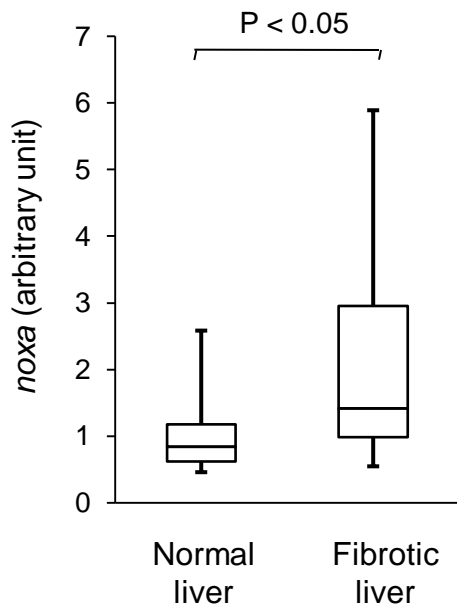

Supplementary Figure 10

**A**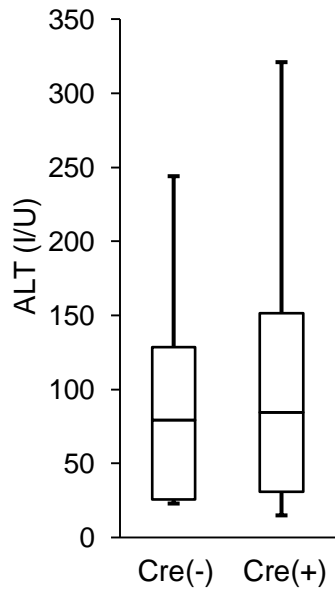**B**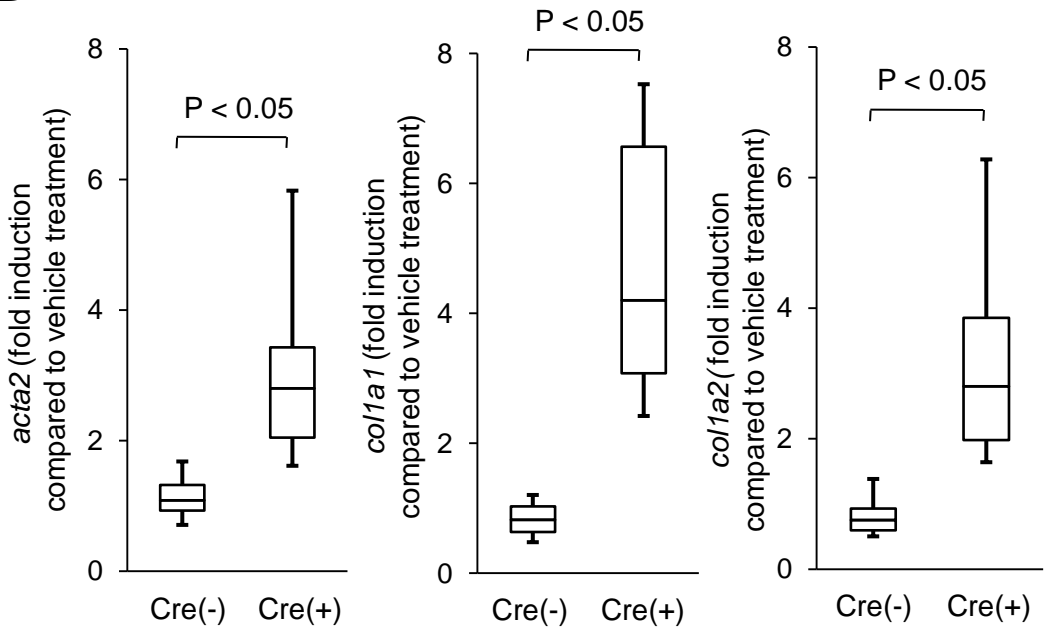

Supplementary Figure 11

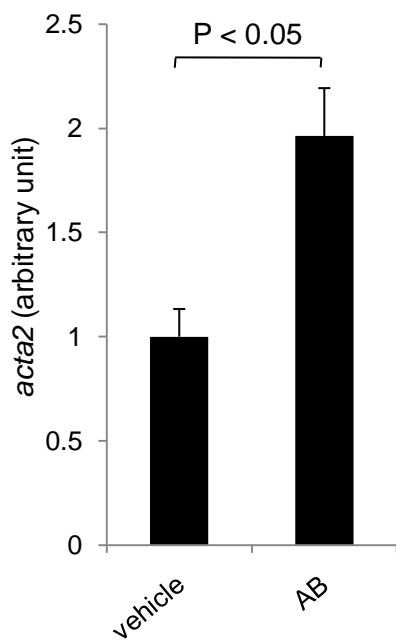

Supplementary Figure 12

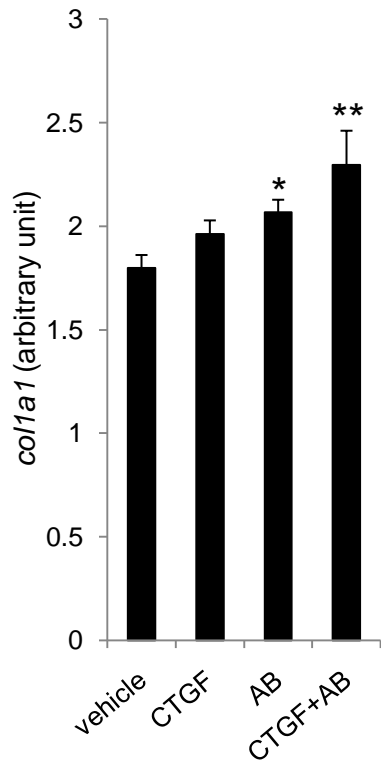

Supplementary Figure 13

Cre(-)

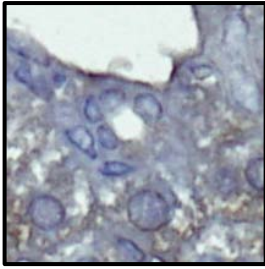

Cre(+)

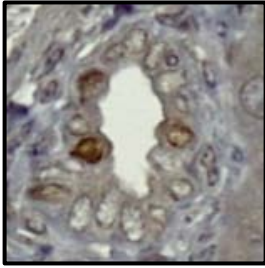

Supplementary Figure 14

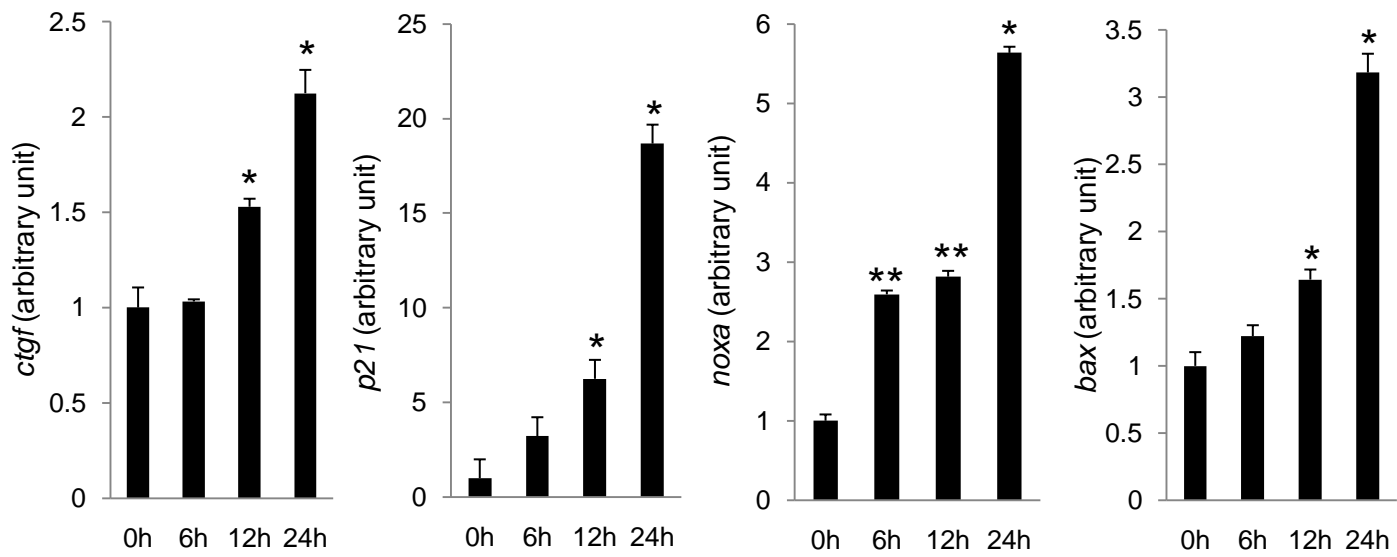

Supplementary Figure 15

## SUPPLEMENTARY FIGURE LEGENDS

**Supplementary Figure 1.** Body weight of offspring from mating of  $mdm2^{FM/+}$   $alb-cre$  mice and  $mdm2^{FM/+}$  mice at 6 weeks of age; 7-11 mice per group.

**Supplementary Figure 2.** Liver fibrosis was evaluated by picosirius red staining of the liver section from  $mdm2^{FM/FM}$   $alb-cre$  mice and  $mdm2^{FM/FM}$  mice at 5 months of age. cre(+) and cre(-) stand for  $mdm2^{FM/FM}$   $alb-cre$  and  $mdm2^{FM/FM}$ , respectively.

**Supplementary Figure 3.**  $tgfb1$  and  $pdgfb$  mRNA levels in the liver tissue were determined by real-time RT-PCR at 6 weeks of age; 6 mice per group. cre(+) and cre(-) stand for  $mdm2^{FM/FM}$   $alb-cre$  and  $mdm2^{FM/FM}$ , respectively.

**Supplementary Figure 4. (A-B)**  $mdm2^{FM/FM}$   $alb-cre$  mice and  $mdm2^{FM/FM}$  mice were subjected to 70% partial hepatectomy or sham operation at 6-8 weeks of age. After 40 hours, BrdU was intraperitoneally injected 2 hours before the mice were sacrificed; 4-8 mice per group. 70% PH stands for 70% partial hepatectomy. cre(+) and cre(-) stand for  $mdm2^{FM/FM}$   $alb-cre$  and  $mdm2^{FM/FM}$ , respectively. Liver regeneration was evaluated by HE and BrdU staining of liver sections **(A)**; black arrows indicate mitotic cells and black arrowheads indicate BrdU positive nuclei. BrdU positive cell counts of liver sections **(B)**. **(C)**  $mdm2^{FM/FM}$   $alb-cre$  mice and  $mdm2^{FM/FM}$  mice were subjected to 70% partial hepatectomy. Their liver weight and body weight were measured 40 hours or 120 hours later and are



presented as percent values for liver weight versus body weight; 4 mice per group. cre(+) and cre(-) stand for  $mdm2^{FM/FM} alb-cre$  and  $mdm2^{FM/FM}$ , respectively.

**Supplementary Figure 5.** Hepatocyte senescence was assessed by senescence-associated  $\beta$ -galactosidase staining of the liver sections. cre(+) and cre(-) stand for  $mdm2^{FM/FM} alb-cre$  and  $mdm2^{FM/FM}$ , respectively.  $alb-creROSA26-LacZ$  mice were used as the control.

**Supplementary Figure 6.** Body weight of the offspring from mating of  $mdm2^{FM/FM} trp53^{flox/+} alb-cre$  mice and  $mdm2^{FM/FM} trp53^{flox/+}$  mice at 6 weeks of age; 8-12 mice per group.

**Supplementary Figure 7.** HepG2 cells were treated with nutlin-3a (20  $\mu$ M) or vehicle for the indicated time courses. Real-time RT-PCR analysis of *pdgfb* and *tgfb1* mRNA expression; N = 3/group.

**Supplementary Figure 8.** HepG2 cells were transfected with *p53* siRNA or control siRNA for 2 days and then cultured for 24 h with vehicle or nutlin-3a (20  $\mu$ M) (left) or adriamycin (1  $\mu$ M) (right). Real-time RT-PCR analysis of *p53* mRNA expression; N = 3/group; \* $P < 0.01$  vs. control siRNA groups.

**Supplementary Figure 9. (A-B)** Balb/c mice were given hydrodynamic injection of ORF9-mp53 plasmid or an injection of its control plasmid via the tail vein and

sacrificed 2 days later; 4-5 mice per group. p53 and control stand for mice given hydrodynamic injection of pORF-mp53 plasmid and mice given hydrodynamic injection of the control plasmid, respectively. Expression of p53 proteins in the liver sections was assessed by immunohistochemistry examination **(A)**. *ctgf* mRNA levels in the liver tissue were determined by real-time RT-PCR **(B)**. Statistical analyses were performed by the paired *t*-test.

**Supplementary Figure 10.** A total of 21 non-tumorous human liver samples were subdivided into two groups of normal liver and fibrotic liver based on histological analysis. *nox*a mRNA levels in the liver were determined by real-time RT-PCR. N = 11 (normal liver group) and 10 (fibrotic liver group).

**Supplementary Figure 11. (A-B)** ABT-737 (100 mg/kg) or vehicle was intraperitoneally administered to *mdm2<sup>FM/FM</sup>alb-cre* mice and *mdm2<sup>FM/FM</sup>* mice, which were examined 2 days later; 4-6 mice per group; Cre(+) and Cre(-) stand for *mdm2<sup>FM/FM</sup>alb-cre* and *mdm2<sup>FM/FM</sup>*, respectively. Serum levels of alanine aminotransferase (ALT) upon ABT-737 administration **(A)**. *acta2*, *co1a1* and *col1a2* mRNA levels in the liver were determined by real-time RT-PCR **(B)**; data are presented as the fold induction of the ABT-737-treated group compared to the vehicle-treated group.

**Supplementary Figure 12.** Hepatic stellate cells (HSCs) isolated from C57BL/6J mice were co-cultured with apoptotic bodies derived from UV-treated BNL CL.2 cells for 48 h. AB stands for apoptotic bodies. *acta2* mRNA levels of

HSCs were determined by real-time RT-PCR; n = 4 / group, statistical analyses were performed by the paired *t*-test.

**Supplementary Figure 13.** HSCs isolated from C57BL/6J mice were co-cultured with apoptotic bodies derived from UV-treated BNL CL.2 cells, with or without recombinant CTGF (100 ng/ml) for 24 h. AB stands for apoptotic bodies. *col1a1* mRNA levels of HSCs were determined by real-time RT-PCR; n = 4 / group. \**P* < 0.01 vs. vehicle and CTGF+AB groups, \*\**P* < 0.01 vs. the other three groups.

**Supplementary Figure 14.** Expression of p53 protein in cholangiocytes was determined by Immunohistochemical analysis. cre(+) and cre(-) stand for *mdm2<sup>FM/FM</sup> alb-cre* and *mdm2<sup>FM/FM</sup>*, respectively.

**Supplementary Figure 15.** SNU-1079 cells were treated with nutlin-3a (20 μM) or vehicle for the indicated time courses. *ctgf*, *p21*, *noxa* and *bax* mRNA levels were determined by real-time RT-PCR; N = 3/group; \**P* < 0.01 vs. the other three groups, \*\**P* < 0.01 vs. 0 h and 24 h groups.
